# Supplementary material
Source: PubMed Central journal article supplement (PMC10390920)
Supplement: jmcp.2020.26.11.1399_s001.pdf [file jmcp.2020.26.11.1399_s001.pdf]

## **SUPPLEMENTARY MATERIALS**

### **Healthcare resource utilization and cost among patients with type 1 diabetes in the United States**

Jason C Simeone, MS, PhD; Surbhi Shah, PhD; Michael L Ganz, MS, PhD; Sean Sullivan, PhD; Anne Koralova, PhD; Jackie LeGrand, MPP; and Jesse Bushman, MA

### **Supplementary Table 1. ICD-9-CM and ICD-10-CM Codes for Charlson Comorbidity Index and Comorbid Conditions**

### **Supplementary Table 2. Codes for Insulin Pumps, Continuous Blood Glucose Monitors, and Related Diabetes Supplies**

### **Supplementary Figure 1. Sample Attrition**

**Supplementary Table 1. ICD-9-CM and ICD-10-CM Codes for Charlson Comorbidity Index and Comorbid Conditions**

| Clinical Condition                              | ICD-9-CM                                                                                                      | ICD-10-CM                                                                                                                                  |
|-------------------------------------------------|---------------------------------------------------------------------------------------------------------------|--------------------------------------------------------------------------------------------------------------------------------------------|
| <b>Charlson Comorbidity Index<sup>13</sup></b>  |                                                                                                               |                                                                                                                                            |
| AIDS/HIV                                        | 042.x–044.x                                                                                                   | B20.x                                                                                                                                      |
| Any malignancy, including lymphoma and leukemia | 140.x–195.8, 200.x–208.x                                                                                      | C00.x–C26.x, C30.x–C41.x, C43.x–C58.x, C60.x–C76.x, C81.x–C96.x                                                                            |
| Cerebrovascular disease                         | 362.34, 430.x–438.x                                                                                           | G45.x, G46.x, H34.0, I60.x–I69.x                                                                                                           |
| Chronic pulmonary disease                       | 416.8, 416.9, 490.x–505.x, 506.4, 508.1, 508.8                                                                | I27.8, I27.9, J40.x–J47.x, J60.x–J67.x, J68.4, J70.1, J70.3                                                                                |
| Congestive heart failure                        | 398.91, 402.01, 402.11, 402.91, 404.01, 404.03, 404.11, 404.13, 404.91, 404.93, 425.4–425.9, 428.x            | I09.9, I11.0, I25.5, I13.0, I13.2, I42.0, I42.5–I42.9, I43.x, I50.x, P29.0                                                                 |
| Dementia                                        | 290.x, 294.1, 331.2                                                                                           | F01.x–F03.x, F05.1, G30.x, G31.1                                                                                                           |
| Diabetes with chronic complication              | 250.4–250.7                                                                                                   | E10.2–E10.5, E10.7, E11.2–E11.5, E11.7, E12.2–E12.5, E12.7, E13.2–E13.5, E13.7                                                             |
| Diabetes without chronic complication           | 250.0–250.3, 250.8, 250.9                                                                                     | E10.0, E10.1, E10.6, E10.8, E10.9, E11.0, E11.1, E11.6, E11.8, E11.9, E12.0, E12.1, E12.6, E12.8, E12.9, E13.0, E13.1, E13.6, E13.8, E13.9 |
| Hemiplegia or paraplegia                        | 334.1, 342.x, 343.x, 344.0–344.6, 344.9                                                                       | G04.1, G11.4, G80.1, G80.2, G81.x, G82.x, G83.0–G83.4, G83.9                                                                               |
| Metastatic solid tumor                          | 196.x–199.x                                                                                                   | C77.x–C80.x                                                                                                                                |
| Mild liver disease                              | 070.22, 070.23, 070.32, 070.33, 070.44, 070.54, 070.6, 070.9, 570.x, 571.x, 573.3, 573.4, 573.8, 573.9, V42.7 | B18.x, K70.0–K70.3, K70.9, K71.3–K71.5, K71.7, K73.x, K74.x, K76.0, K76.2–K76.4, K76.8, K76.9, Z94.4                                       |
| Moderate or severe liver disease                | 456.0–456.2, 572.2–572.8                                                                                      | I85.0, I85.9, I86.4, I98.2, K70.4, K71.1, K72.1, K72.9, K76.5, K76.6, K76.7                                                                |

| <b>Clinical Condition</b>         | <b>ICD-9-CM</b>                                                                                                                               | <b>ICD-10-CM</b>                                                                                |
|-----------------------------------|-----------------------------------------------------------------------------------------------------------------------------------------------|-------------------------------------------------------------------------------------------------|
| Myocardial infarction             | 410.x, 412.x                                                                                                                                  | I21.x, I22.x, I25.2                                                                             |
| Peptic ulcer disease              | 531.x–534.x                                                                                                                                   | K25.x–K28.x                                                                                     |
| Peripheral vascular disease       | 47.1, 093.0, 437.3, 440.x, 441.x,<br>443.1–443.9, 557.1, 557.9, V43.4                                                                         | I70.x, I71.x, I73.1, I73.8, I73.9,<br>I77.1, I79.0, I79.2, K55.1, K55.8,<br>K55.9, Z95.8, Z95.9 |
| Renal disease                     | 403.01, 403.11, 403.91, 404.02,<br>404.03, 404.12, 404.13, 404.92,<br>404.93, 582.x, 583.0–583.7, 585.x,<br>586.x, 588.0, V42.0, V45.1, V56.x | I12.0, I13.1, N03.2–N03.7, N05.2–<br>N05.7, N18.x, N19.x, N25.0,<br>Z49.0–Z49.2, Z94.0, Z99.2   |
| Rheumatic disease                 | 446.5, 710.0–710.4, 714.0–714.2,<br>714.8, 725.x                                                                                              | M05.x, M06.x, M31.5, M32.x–<br>M34.x, M35.1, M35.3, M36.0                                       |
| <b>Comorbid Conditions</b>        |                                                                                                                                               |                                                                                                 |
| Anxiety                           | 293.84, 300.00–300.02, 300.09,<br>300.21–300.23, 300.29, 300.3x,<br>308.3x, 309.21, 309.24, 309.28,<br>309.81, 313.0x                         | F40.xx-F48.xx                                                                                   |
| Asthma <sup>29</sup>              | 493.xx                                                                                                                                        | J45.xx                                                                                          |
| Autoimmune thyroid disease        |                                                                                                                                               |                                                                                                 |
| Hashimoto's thyroiditis           | 245.2x                                                                                                                                        | E06.3x                                                                                          |
| Hyperthyroidism (Grave's disease) | 242.xx                                                                                                                                        | E05.xx                                                                                          |
| Hypothyroidism <sup>30</sup>      | 244.xx                                                                                                                                        | E02.xx, E03.xx                                                                                  |
| Celiac disease                    | 579.0x                                                                                                                                        | K90.0x                                                                                          |
| Depression <sup>31</sup>          | 296.20–296.25, 296.30–296.35,<br>296.82, 300.4x, 309.0x, 309.28,<br>311.xx                                                                    | F32.xx, F33.xx, F34.1x, F41.2x,<br>F43.2x                                                       |
| Diabetic ketoacidosis             | 250.1x, 249.1x                                                                                                                                | E08.1x, E09.1x, E10.1x, E13.1x                                                                  |
| Hyperglycemia                     | 250.02, 250.03, 250.1x, 250.2x,<br>250.3x                                                                                                     | R73.xx                                                                                          |
| Hyperlipidemia <sup>32</sup>      | 272.0x-272.4x                                                                                                                                 | E78.0x-E78.5x                                                                                   |
| Hypertension                      | 401.xx-405.xx                                                                                                                                 | I10.xx-I13.xx, I15.xx                                                                           |

| <b>Clinical Condition</b>                                                                     | <b>ICD-9-CM</b>                                                                                                                    | <b>ICD-10-CM</b>                                                                                |
|-----------------------------------------------------------------------------------------------|------------------------------------------------------------------------------------------------------------------------------------|-------------------------------------------------------------------------------------------------|
| Hypoglycemia                                                                                  | 250.3x, 251.0x-251.2x, 250.8x,<br>270.3x, 775.0x, 775.6x, 962.3x                                                                   | E15.xx-E16.xx                                                                                   |
| Limited joint mobility (any, but includes Dupuytren's contracture and carpal tunnel syndrome) | 728.6x, 354.xx, 718.8x                                                                                                             | M72.0x, G56.0x, M24.80, M24.819<br>- M24.859, M23.50, M23.8X9,<br>M24.873, M24.876              |
| <b>Macrovascular complications</b>                                                            |                                                                                                                                    |                                                                                                 |
| Cerebrovascular disease <sup>32</sup>                                                         | 430.xx-438.xx                                                                                                                      | I60.xx-I69.xx, G45.xx                                                                           |
| Congestive heart failure                                                                      | 398.91, 402.01, 402.11, 402.91,<br>404.01, 404.03, 404.11, 404.13,<br>404.91, 404.93, 425.4, 425.5, 425.7,<br>425.8, 425.9, 428.xx | I09.9x, I11.0x, I13.0x,<br>I13.2x, I25.5x, I42.0x, I42.5x-<br>I42.9x, I43.xx, I50.xx, P29.0x    |
| Coronary heart disease                                                                        | 410.xx-414.xx, 425.xx-429.xx                                                                                                       | I20.xx-I25.xx, I42.xx-I44.xx,<br>I50.xx, I51.xx                                                 |
| Peripheral vascular disease                                                                   | 093.0, 437.3, 440.x, 441.x, 443.1-<br>443.9, 447.1, 557.1, 557.9, V43.4                                                            | I70.x, I71.x, I73.1, I73.8, I73.9,<br>I77.1, I79.0, I79.2, K55.1, K55.8,<br>K55.9, Z95.8, Z95.9 |
| <b>Microvascular complications</b>                                                            |                                                                                                                                    |                                                                                                 |
| Diabetic nephropathy <sup>32</sup>                                                            | 250.4x                                                                                                                             | E11.29, E10.29, E11.21, E11.65,<br>E10.21, E10.65                                               |
| Diabetic neuropathy <sup>31,33</sup>                                                          | 250.6x, 357.2                                                                                                                      | E11.40, E10.40, E11.40, E11.65,<br>E10.40, E10.65, E08.42, E09.42,<br>E10.42, E11.42, E13.42    |
| Diabetic retinopathy                                                                          | 250.5x, 362.0x, 362.1x, 362.2x,<br>362.83, 362.53, 362.81, 362.82,<br>361.xx, 369.xx, 379.23                                       | H25.xx-H26.xx, H28.xx, H34.xx-<br>H36.xx, E10.3x, E11.3x, E12.3x,<br>E13.3x, E14.3x             |
| Osteopenia and Osteoporosis <sup>34</sup>                                                     | 733.9x, 733.0x                                                                                                                     | M85.8x, M80.x, M81.x                                                                            |

Abbreviations: AIDS = acquired immunodeficiency syndrome; HIV = human immunodeficiency virus; ICD-9-CM = International Classification of Diseases, Ninth Revision, Clinical Modification; ICD-10-CM = International Classification of Diseases, 10th Revision, Clinical Modification

**Supplementary Table 2. Codes for Insulin Pumps, Continuous Blood Glucose Monitors, and Related Diabetes Supplies**

| <b>Code Description</b>                                                                                                                                                                         | <b>HCPCS</b> | <b>NDC Codes</b>                                                 |
|-------------------------------------------------------------------------------------------------------------------------------------------------------------------------------------------------|--------------|------------------------------------------------------------------|
| <b>Insulin pump and related supplies</b>                                                                                                                                                        |              |                                                                  |
| Artificial pancreas device system (e.g., LGS feature) including continuous glucose monitor, blood glucose device, insulin pump and computer algorithm that communicates with all of the devices | S1034        |                                                                  |
| External ambulatory infusion pump, insulin                                                                                                                                                      | E0784        |                                                                  |
| External ambulatory insulin delivery system, disposable, each, includes all supplies and accessories                                                                                            | A9274        |                                                                  |
| Infusion set for external insulin pump, needle type                                                                                                                                             | A4231        |                                                                  |
| Infusion set for external insulin pump, non-needle cannula type                                                                                                                                 | A4230        |                                                                  |
| Receiver (monitor); external, for use with artificial pancreas device system                                                                                                                    | S1037        |                                                                  |
| Sensor; invasive (e.g., subcutaneous), disposable, for use with artificial pancreas device system                                                                                               | S1035        |                                                                  |
| Syringe with needle for external insulin pump, sterile, 3 cc                                                                                                                                    | A4232        |                                                                  |
| T: Slim                                                                                                                                                                                         |              | 89152-4629-01<br>89152-3380-05<br>08521-2306-10<br>08521-2309-10 |
| Transmitter; external, for use with artificial pancreas device system                                                                                                                           | S1036        |                                                                  |
| <b>Continuous blood glucose monitoring and related supplies</b>                                                                                                                                 |              |                                                                  |
| Artificial pancreas device system (e.g., LGS feature) including continuous glucose monitor, blood glucose device, insulin pump and computer algorithm that communicates with all of the devices | S1034        |                                                                  |
| Continuous noninvasive glucose monitoring device, purchase                                                                                                                                      | S1030        |                                                                  |
| Continuous noninvasive glucose monitoring device, rental, including sensor, sensor replacement, and download to monitor                                                                         | S1031        |                                                                  |
| Receiver (monitor); external, for use with artificial pancreas device system                                                                                                                    | S1037        |                                                                  |

| Code Description                                                                                                                           | HCPCS | NDC Codes |
|--------------------------------------------------------------------------------------------------------------------------------------------|-------|-----------|
| Receiver (monitor); external, for use with interstitial continuous glucose monitoring system                                               | A9278 |           |
| Sensor; invasive (e.g., subcutaneous), disposable, for use with artificial pancreas device system                                          | S1035 |           |
| Sensor; invasive (e.g., subcutaneous), disposable, for use with interstitial continuous glucose monitoring system, one unit = 1 day supply | A9276 |           |
| Transmitter; external, for use with artificial pancreas device system                                                                      | S1036 |           |
| Transmitter; external, for use with interstitial continuous glucose monitoring system                                                      | A9277 |           |

Note: codes for artificial pancreas systems (devices that deliver insulin and monitor blood glucose) are used to define insulin pump and continuous blood glucose monitor usage.

Abbreviations: HCPCS = Healthcare Common Procedure Coding System; LGS = low glucose suspend; NDC = National Drug Code

## Supplementary Figure 1. Sample Attrition

|                                                                                                                                                                     | MarketScan Database<br>Excluded → Remaining | Optum EMR Database<br>Excluded → Remaining | Optum Integrated Database<br>Excluded → Remaining |
|---------------------------------------------------------------------------------------------------------------------------------------------------------------------|---------------------------------------------|--------------------------------------------|---------------------------------------------------|
| Has at least one potential index claim with a T1DM diagnosis (ICD-9 250.x1, 250.x3; ICD-10 E10.x)                                                                   | 935,096                                     | 450,538                                    | 79,057                                            |
| Has an index claim with continuous pre-index enrollment of 6 months                                                                                                 | 168,045 → 767,051                           | 71,120 → 379,418                           | 33,699 → 45,358                                   |
| Has at least one dispensing or administration of insulin or an insulin pump during the continuous enrollment period within +/- 90 days around index                 | 253,705 → 513,346                           | 141,399 → 238,019                          | 15,095 → 30,263                                   |
| No use of sulfonylureas or drug combinations containing sulfonylureas at any time during the study period                                                           | 111,087 → 402,259                           | 38,829 → 199,190                           | 6,409 → 23,854                                    |
| No use of TZDs or drug combinations containing TZDs at any time during the study period                                                                             | 19,913 → 382,346                            | 4,813 → 194,377                            | 986 → 22,868                                      |
| No evidence of secondary or gestational diabetes at any time during the study period                                                                                | 22,822 → 359,524                            | 40,809 → 153,568                           | 3,176 → 19,692                                    |
| Does not meet the minimum percentage of T1DM claims days for all diabetes claim days corresponding to age at index during up to 365 days of baseline and follow-up* | 173,930 → 185,594                           | 67,111 → 86,457                            | 10,533 → 9,159                                    |
| Has record of at least one insulin product that is not long-acting during the study period                                                                          | 4,171 → 181,423                             | 1,698 → 84,759                             | 211 → 8,948                                       |
| <b>Included in cohort</b>                                                                                                                                           | <b>181,423</b>                              | <b>84,759</b>                              | <b>8,948</b>                                      |

\* >0% for age <16 years, ≥50% for age 16–45 years, ≥70% for age >45 years

Abbreviations: EMR = electronic medical record; ICD-9 =International Classification of Diseases, Ninth Revision; ICD-10 = International Classification of Diseases, 10th Revision; T1DM = type 1 diabetes mellitus; TZD = thiazolidinedione
